# Supplementary material for: Antisense Oligonucleotides against miR-21 Inhibit the Growth and Metastasis of Colorectal Carcinoma via the DUSP8 Pathway
Source: PubMed Central journal article supplement — Mol Ther Nucleic Acids. 2018 Sep 13;13:244–55. doi: 10.1016/j.omtn.2018.09.004 (PMC6187053; doi:10.1016/j.omtn.2018.09.004), 2018-09-13
Supplement: mmc1.pdf [file mmc1.pdf]

**OMTN, Volume 13**

**Supplemental Information**

**Antisense Oligonucleotides against miR-21  
Inhibit the Growth and Metastasis of Colorectal  
Carcinoma via the DUSP8 Pathway**

**Tao Ding, Panpan Cui, Ya Zhou, Chao Chen, Juanjuan Zhao, Hairong Wang, Mengmeng Guo, Zhixu He, and Lin Xu**

## **Material and methods**

### **Cell culture**

Human colon carcinoma cell line HCT116 was obtained from the Shanghai Institutes for Biological Sciences Cell Resource Center (Catalog Number: TCHu99, the latest identification in 2018) and cultured in McCoy's 5A medium (Life Technologies Corporation, Grand Island, USA), containing 100IU/mL penicillin, 100 µg/mL streptomycin, 20mM glutamine and 10% fetal bovine serum (Gibco, Grand Island, USA), incubated in a humidified incubator at 37°C with 5%CO<sub>2</sub>.

### **Xenografts model antitumor assay in nude mice**

For *in vivo* study, Athymic nude mice (BALB/C, 4-6 weeks old, female) were purchased from the Shanghai Laboratory Animal Research Center (Shanghai, China). Animals were in line with the *Guidelines for the Care and Use of Laboratory Animals* (Ministry of Health, People's Republic of China, 1998), and all the experimental procedures were approved by the ethical guidelines of Shanghai Medical Laboratory Animal Care and Use Committee (permit number: 2013018). For the preparation of subcutaneous xenograft model, cells were subcutaneously implanted into the right flanks of nude mice at  $4.5 \times 10^6$  HCT116 cells density ( $n=12$ ). Then seven days after tumor cells inoculation with confirmation of successful maturation of tumors, 12 mice were divided randomly into two groups (6 mice per group). The 100µg plasmid of p-miR-21-ASOs or p-Cont was given locally by direct injection into the tumor tissues of nude mice at four times every three days. Meanwhile, tumor volume was calculated by the formula: volume (mm<sup>3</sup>)= length×width<sup>2</sup>/2. After 18 days of treatment, all mice were sacrificed. Tumor tissues were stored at -80°C for further experiments.

### **RNA and miRNA isolation and qRT-PCR**

Total RNA was isolated from cell lines or tumor tissues with RNAiso Plus reagents (Takara, Ohtsu, Japan) according to the manufacturer's instructions. Taq-Man MicroRNA Reverse Transcription Kit (ThermoFisher Scientific, USA) and PrimeScrip<sup>TM</sup>MRT Reagent Kit (Takara, Kusatsu, Japan) were used for reverse transcription of miRNA-21 and indicated genes respectively. qRT-PCR was performed to quantify mature miRNA-21 expression and mRNA expression using the miR-21 probe of Taq-Man (Life Technologies Corporation, Grand Island, USA) and SYBR<sup>®</sup> Premix Ex Taq<sup>TM</sup> II (Takara, Kusatsu, Japan). Data collection was accomplished on the CFX96<sup>TM</sup> Real-Time System (Bio-Rad, Hercules, USA). Relative expression level was normalized and calculated using the relative quantification ( $2^{-\Delta\Delta Ct}$ ) method. The indicated genes and their primer sequences were shown in Tab. S1.

### **Immunofluorescence**

Ki-67 (Proliferating Cell Nuclear Antigen) was used to assess the proliferation of tumor cells in tumor tissues after locally injected the plasmid of p-miR-21-ASOs or p-Cont. All frozen sections of tumor tissues were cut into 5µm thick slides. After washed with PBS for thrice and blocked with 10% normal goat serum for 30 minutes at room temperature and were incubated with rabbit-monoclonal anti-human anti-Ki-67 antibody (1:100, Santa Cruz Biotechnology, CA) at 4°C

for overnight; then, the sections were washed in PBS and incubated with a secondary antibody of Alexa Fluor 594 conjugated goat-anti-rabbit IgG (1:250, Invitrogen, Grand Island, USA) for 1 hour in the dark at room temperature. After washed in PBS for thrice, the slides were counterstained, mounted with SlowFade Gold Antifade Reagent with DAPI (40, 6-diamidino-2-phenylindole) (ThermoFisher Scientific, USA), and left for ten mins in the dark at room temperature before examination by fluorescence microscopy (Zeiss Axioplan 2, Gottingen, Germany).

TUNEL assay was performed according to the manufacturer's protocol. In brief, after antigen retrieval, the slides were washed in PBS thrice and incubated with 50ul of TUNEL reaction mixture (In situ Cell Death Detection Kit, Roche, Mannheim, Germany) for 2 hours at 37°C. Finally, the slides were also counterstained by DAPI after washed in PBS and evaluated by fluorescence microscopy. Image J software was used for analyzing the fluorescence intensity of images, and the mean optical density values represented by the relative number of apoptotic cells.

### **Gene expression microarray and analysis**

Agilent Feature Extraction software (version 11.0.1.1) was used to analyze acquired array images. Quantile normalization and subsequent data processing were performed using the GeneSpring GX v12.1 software package (Agilent Technologies). After quantile normalization of the raw data, genes that at least 1 out of 2 samples had flags in Detected ("All Targets Value") were chosen for further data analysis. Differentially expressed genes with statistical significance between the two groups were identified through Volcano Plot filtering. Differentially expressed genes between the two samples were identified through Fold Change filtering. Hierarchical Clustering was performed using the R scripts. GO analysis was performed in the standard enrichment computation method.

### **Statistical data analysis**

All data were presented as means  $\pm$  standard deviation (SD) from at least three independent experiments. Unpaired Student's *t*-test (two-tailed) was performed to evaluate the statistical significance by using GraphPad Prism 6 software. Differences were considered as statically significant when probability *P* values less than 0.05 ( $P < 0.05$ ).

**Fig. S1**

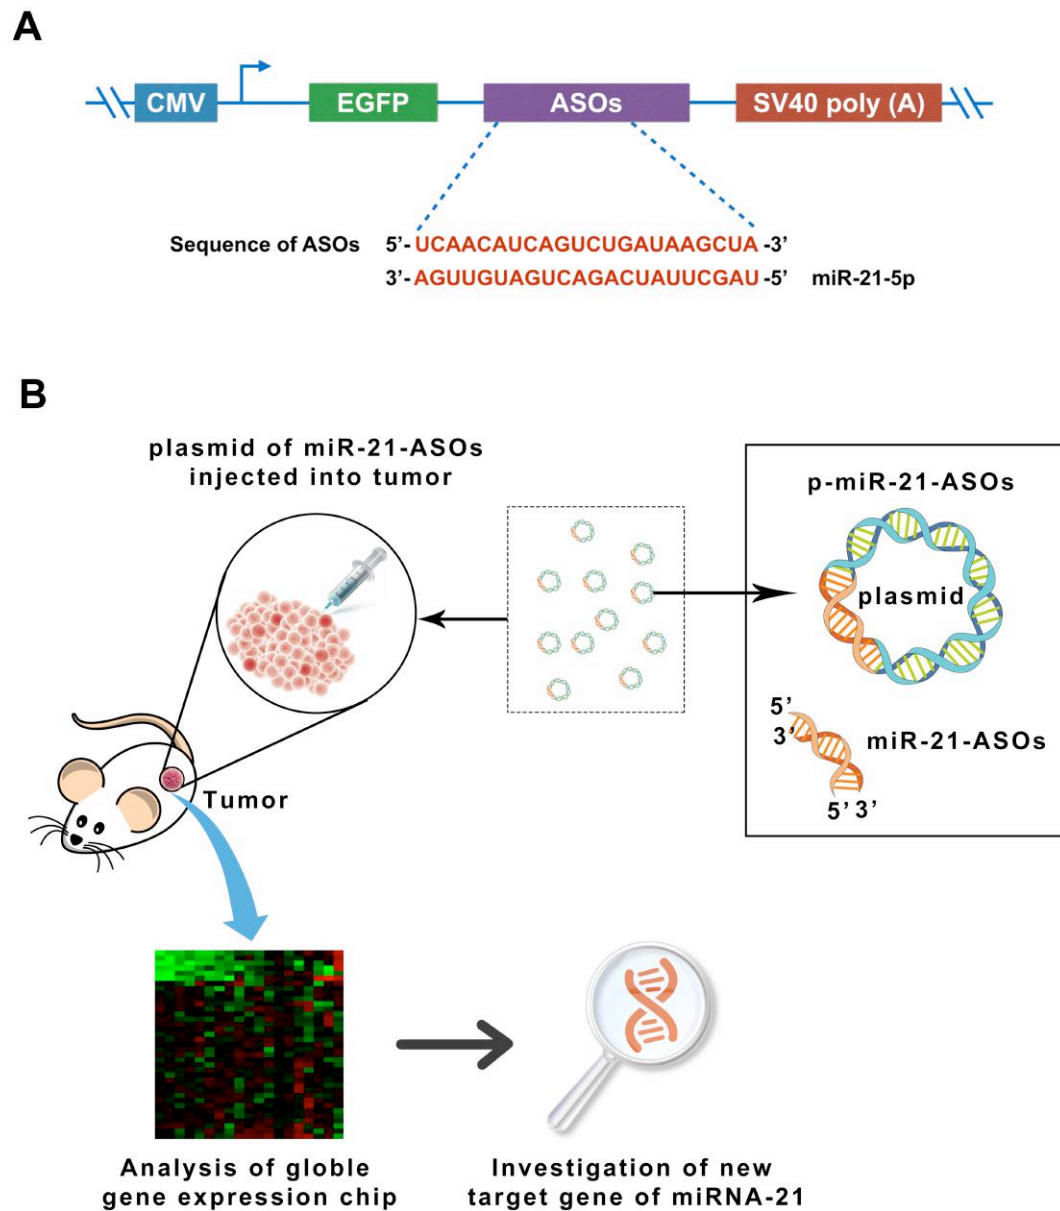

**Fig. S1. The design of the current study.**

(A) The sequence of ASOs against miR-21. (B) The sketch map for the current research study. A xenografts model of CRC in nude mice was established. After local treatment of p-miR-21 ASO plasmids, the tumor tissue was obtained, and then global gene array analysis was performed. Next, the possible target molecule mechanism was investigated.

**Fig. S2**

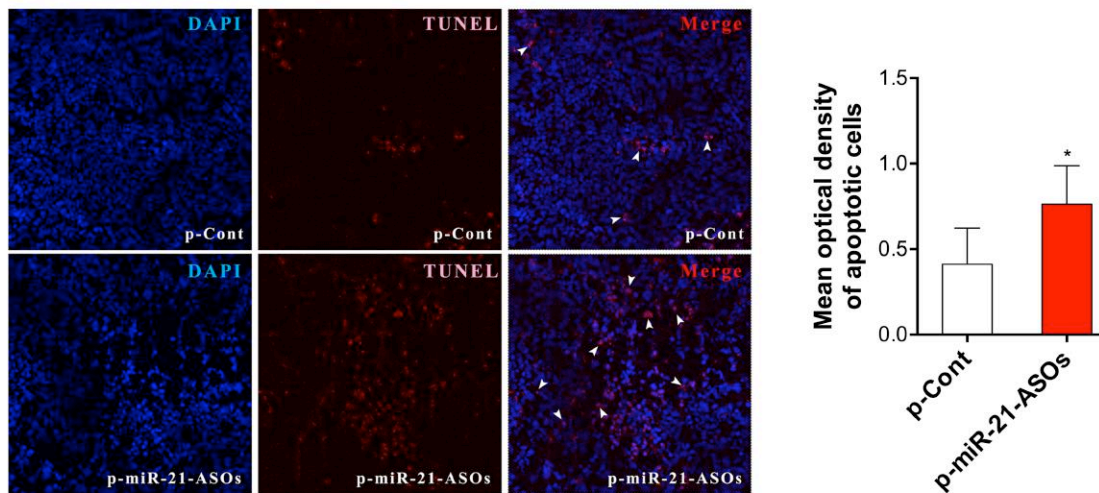

**Fig. S2. The cell apoptosis in CRC tumor tissue.**

The Human CRC SW620 cells were injected subcutaneously into the right flank of BALB/c nude mice (n =10 per group). Seven days later, the plasmid of p-miR-21-ASOs (100 $\mu$ g) or p-Cont (100 $\mu$ g) was locally given by subcutaneous injection into the tumor tissues of nude mice four times every three days. Six days after the last injection, tumor tissues were collected. The apoptosis in tumor tissue was analyzed by TUNEL assay, and the numbers of relative apoptotic cells were calculated with mean optical density by Image J software. \* $P$ <0.05.

Fig. S3

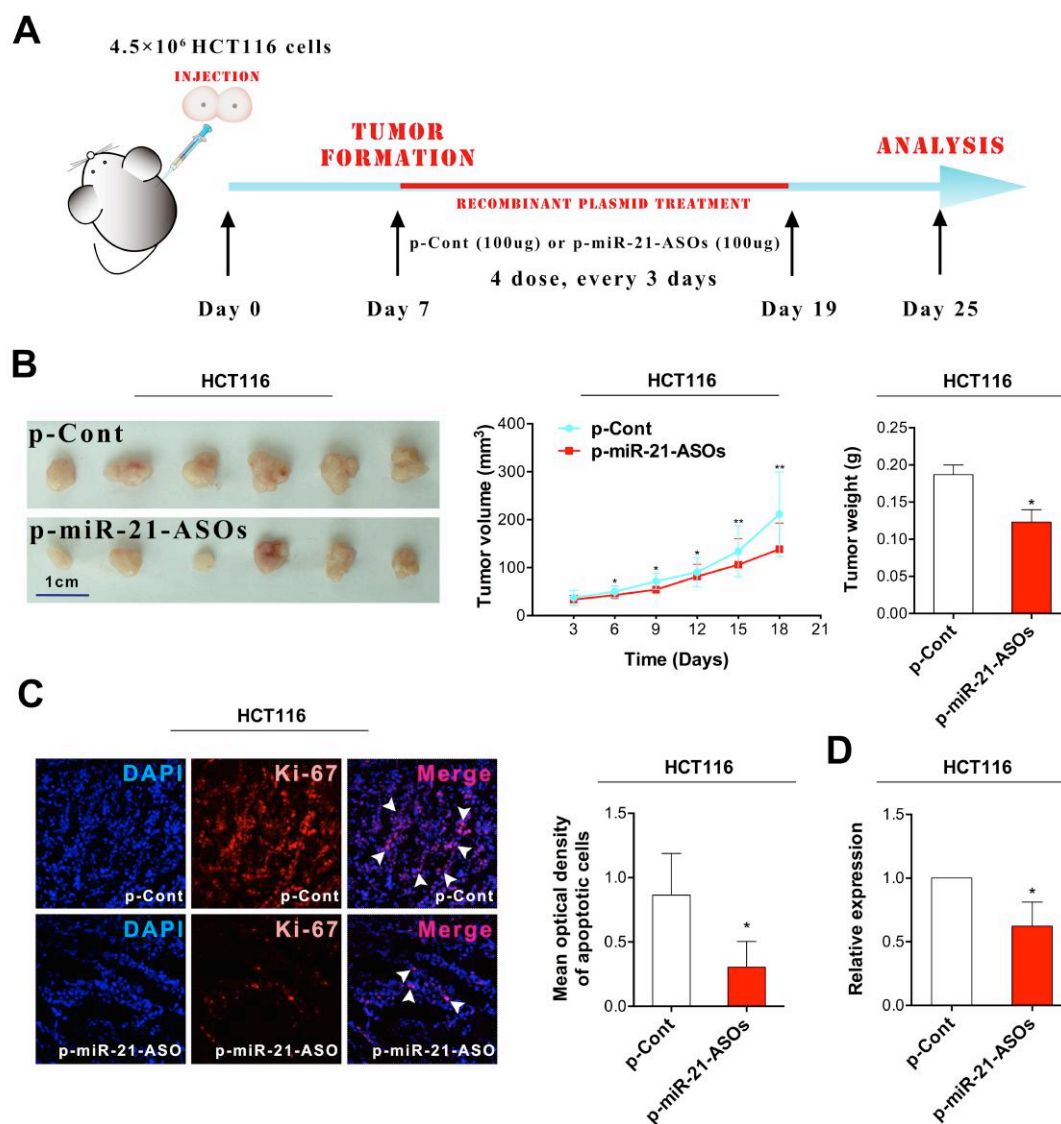

Fig. S3. ASOs against miR-21 inhibited the growth and metastasis of HCT116 human colorectal carcinoma cells *in vivo*.

The Human CRC HCT116 cells were injected subcutaneously into the right flank of BALB/c nude mice (n =6 per group). Seven days later, the plasmid of p-miR-21-ASOs (100µg) or p-Cont (100µg) was locally given by subcutaneous injection into the tumor tissues of nude mice four times every three days. Six days after the last injection, tumor tissues were collected. (A) The schematic diagram of the *in vivo* experiment. (B) The representative image, growth curve and weight of tumors were shown. (C) The expression of Ki-67 in tumor tissues was analyzed by immunofluorescence assay, and the mean optical density of Ki-67 was calculated with Image J software. (D) Real-time PCR detected the expression of miR-21 in tumor tissues. \*P<0.05.

**Fig. S4**

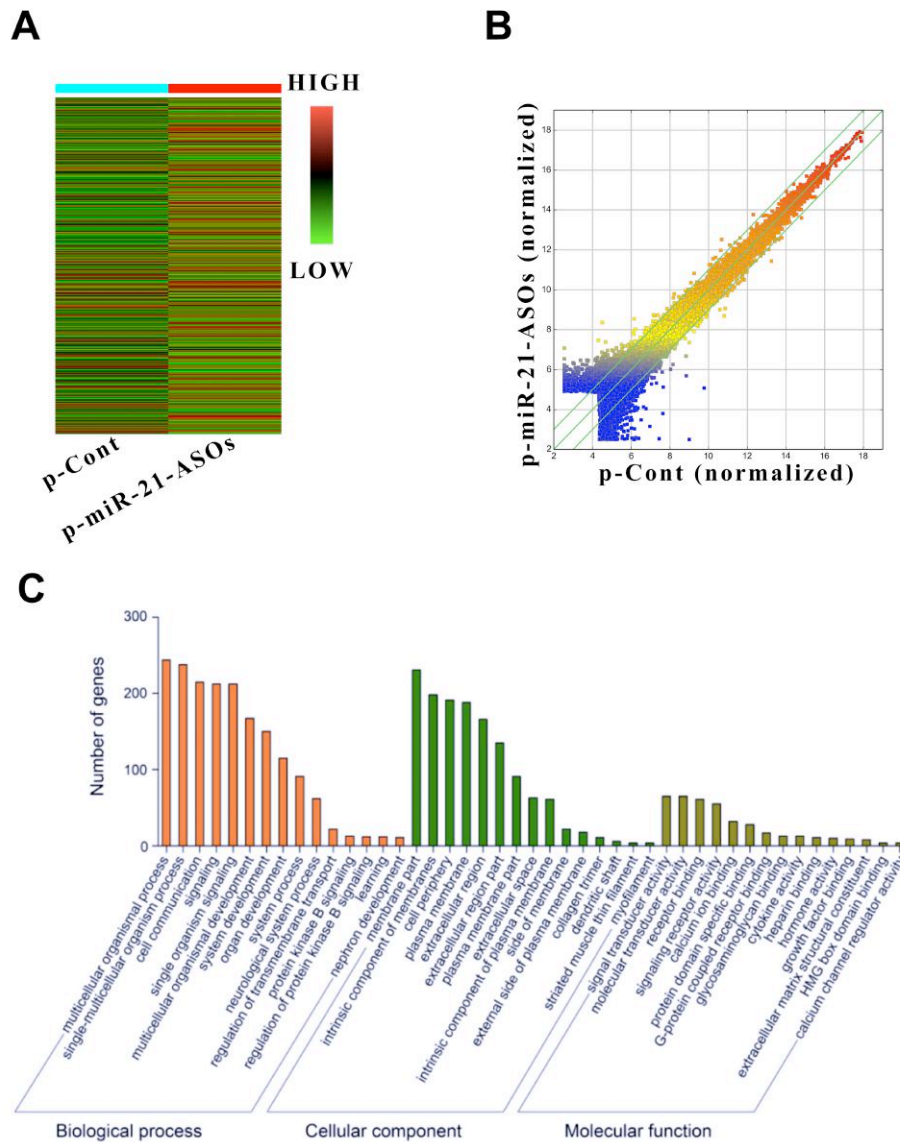

**Fig. S4. The analysis of global gene expression in CRC tumor tissue.**

The Human CRC SW620 cells were injected subcutaneously into the right flank of BALB/c nude mice (n =10 per group). Seven days later, the plasmid of p-miR-21-ASOs (100 $\mu$ g) or p-Cont (100 $\mu$ g) was locally given by subcutaneous injection into the tumor tissues of nude mice four times every three days. Six days after the last injection, tumor tissues were collected. The global gene expression was analyzed and matched by cDNA Microarray chip. (A) The heatmap and (B) scatterplot of global gene expression. (C) The GO terms of upregulated genes.

**Tab. S1. The primer sequence used for Real-time quantitative PCR**

| <b>Gene</b> | <b>Primer sequence (5'-3')</b>                        |
|-------------|-------------------------------------------------------|
| CDK2        | F: TTCTGCCATTCTCATCGG<br>R: ATGGGTGTAAGTACGAACAGG     |
| CDK3        | F: GTTTCTGCCACTCACATCGG<br>R: ACCACAGTGTCACCACCTCAT   |
| CDK4        | F: TTCGTGAGGTGGCTTTACTG<br>R: GATATGTCCTTAGGTCCTGGTCT |
| CDK6        | F: CTCCGAGGTCTGGACTTTTCT<br>R: TGCTCTGTACCACAGCGTGA   |
| MMP-2       | F: TATGGCTTCTGCCCTGAGAC<br>R: CACACCACATCTTTCCGTCA    |
| MMP-9       | F: CGCAGACATCGTCATCCAGT<br>R: GAAATGGGCGTCTCCCTGAA    |
| E-Cadherin  | F: GCCGAGAGCTACACGTTTAC<br>R: CACACCATCTGTGCCCACTT    |
| CXCR4       | F: ATCAGTCTGGACCGCTACCT<br>R: ATCTGCCTCACTGACGTTGG    |
| DUSP8       | F: TCCCGAGGAAGGTGATGGAT<br>R: AGCTTGGAGCAGCAGATGTT    |
| STAG2       | F: TCCTTCTGGTCCAAACCGAAT<br>R: ACCGACTGCATAGCACTCTTG  |
| PDZD2       | F: TCTGTACTGTGTACCTCACCAA<br>R: CCCTGCGCTTTTACCATAG   |
| CCL-1       | F: CTCATTTGCGGAGCAAGAGAT<br>R: GCCTCTGAACCCATCCAACCTG |
| B3GAT2      | F: TTGTCATCATCATGCTCGACG<br>R: CACCGCGTAGGGAGAGAAGTA  |
| GAPDH       | F: GCACCGTCAAGGCTGAGAAC<br>R: TGGTGAAGACGCCAGTGGA     |

F: Forward primer, R: Reverse primer



**Table 2. Over 4-fold upregulation genes (195) in p-miR-21-ASOs injection group**

| <b>Target Gene</b> | <b>Fold Change</b> | <b>Target Gene</b> | <b>Fold Change</b> | <b>Target Gene</b> | <b>Fold Change</b> |
|--------------------|--------------------|--------------------|--------------------|--------------------|--------------------|
| lnc-ABCF2-1        | 4.0019413          | SLC13A3            | 4.5040221          | SHANK2             | 5.2867591          |
| FNDC1              | 4.0044525          | VEPH1              | 4.5318044          | PLA2G2F            | 5.2883952          |
| MAFA               | 4.005127           | MPZ                | 4.5958694          | CTSZ               | 5.2955003          |
| WFIKKN1            | 4.0144908          | XLOC_I2_011874     | 4.6325043          | PAX3               | 5.2991057          |
| B9D1               | 4.0258092          | SNAP91             | 4.6575066          | CFAP57             | 5.3390694          |
| PFKFB1             | 4.0531942          | ZNF853             | 4.6700345          | DUPD1              | 5.3955058          |
| KRT28              | 4.0651444          | TOM1L2             | 4.6727699          | PRSS27             | 5.4060592          |
| FAM71E2            | 4.0651655          | HAUS8              | 4.6778831          | CCDC180            | 5.4716187          |
| IZUMO3             | 4.0751589          | ARID1B             | 4.7406921          | ARHGAP23           | 5.4862433          |
| XLOC_I2_013192     | 4.0766169          | AGER               | 4.7446346          | CLIC3              | 5.4940186          |
| CRIP2              | 4.0865744          | DOK7               | 4.7594             | ZBTB21             | 5.5444394          |
| TCTE3              | 4.0965991          | CEMP1              | 4.7822996          | SLC22A16           | 5.6031663          |
| EFHD1              | 4.0978126          | IGFALS             | 4.7905072          | LOC653712          | 5.6173601          |
| LZTS1              | 4.1484566          | lnc-DTYMK-3        | 4.7949099          | CTSL3P             | 5.6233257          |
| LMX1B              | 4.1511308          | ANKRD63            | 4.7980314          | BCAS1              | 5.6241743          |
| PNMA6A             | 4.186282           | TSPYL5             | 4.833729           | GLTSCR1            | 5.6293081          |
| lnc-LANCL2-1       | 4.1891252          | FABP3              | 4.847703           | HRCT1              | 5.6563194          |
| TCEB3C             | 4.2038424          | MROH7              | 4.8489689          | SCN2A              | 5.6782446          |
| NRG2               | 4.2299699          | ADARB2             | 4.8505488          | CHIT1              | 5.7129183          |
| ADAMTSL1           | 4.2448101          | TNRC6C-AS1         | 4.8854302          | KIF18B             | 5.7133915          |
| CHD5               | 4.2492647          | TPH1               | 4.8917182          | THY1               | 5.7146003          |
| OR2G6              | 4.2791786          | ATP5L2             | 4.9048622          | DNM1               | 5.7399895          |
| GDPD2              | 4.2808367          | OR10G3             | 4.9055102          | OR1K1              | 5.7498416          |
| DNAI2              | 4.2945051          | LOC645427          | 4.9265739          | PSCA               | 5.7807845          |
| CTLA4              | 4.2999044          | CRTAC1             | 4.9383969          | TRIM17             | 5.7890347          |
| ALOX12P2           | 4.3114379          | CNTLN              | 4.9489138          | MUC13              | 5.8172338          |
| BCAM               | 4.3444348          | NPPB               | 4.9567284          | LOC101929469       | 5.8240482          |
| HCCAT5             | 4.3514487          | TMEM164            | 4.9885039          | DKK3               | 5.8456684          |
| KIF18B             | 4.3767895          | SLC27A6            | 5.05487            | TLR4               | 5.8486749          |
| TNNI3              | 4.383735           | AIDA               | 5.1122228          | ABHD11-AS1         | 5.9031635          |
| NUTM1              | 4.4087204          | OR4B1              | 5.1124205          | LINC00544          | 5.9538072          |
| LOC100132111       | 4.4106271          | CCDC183            | 5.1307371          | COL25A1            | 5.9563263          |
| MUC22              | 4.4112472          | LOC100131910       | 5.131792           | LOC102723640       | 5.9698712          |
| LINC00856          | 4.4162211          | UROC1              | 5.1570016          | ELL                | 5.9992539          |
| P4HA2              | 4.4187276          | LINC00589          | 5.1700108          | DOC2B              | 6.0063698          |
| MYEOV2             | 4.423228           | CXorf49B           | 5.1925097          | PRO1082            | 6.0244277          |
| PHKG1              | 4.4482371          | DLG2               | 5.2214627          | PPAN-P2RY11        | 6.0281303          |
| SPATA21            | 4.4531821          | RBMY2EP            | 5.2477631          | SYNGAP1            | 6.0409326          |
| SPRR2D             | 4.4644025          | C17orf74           | 5.266649           | OR9Q2              | 6.0735196          |
| FAM25C             | 4.4675352          | FAM83G             | 5.2693427          | CCDC134            | 6.0805149          |

Continued

| Target Gene  | Fold Change | Target Gene  | Fold Change | Target Gene  | Fold Change |
|--------------|-------------|--------------|-------------|--------------|-------------|
| JPH4         | 6.0977851   | HNF4A        | 6.6072778   | AVP          | 7.6798264   |
| LOC100129581 | 6.1124404   | TMEM200C     | 6.6725139   | MFSD6L       | 7.7449155   |
| FAM231A      | 6.1261437   | TMEM8B       | 6.6888644   | TMEM120B     | 7.7930766   |
| WISP2        | 6.1461509   | MXRA8        | 6.6904238   | MAPK12       | 7.9343025   |
| PRLH         | 6.1702259   | LOC100126784 | 6.7854006   | C11orf88     | 7.9495285   |
| AHNAK2       | 6.2040431   | <b>DUSP8</b> | 6.790195    | FBXO24       | 8.5436426   |
| PYGM         | 6.2043527   | CYP4F22      | 6.8349842   | IL17F        | 8.6711095   |
| LTBP3        | 6.2258383   | C2orf74      | 6.8761108   | TMCC2        | 8.7511723   |
| QRFP         | 6.2635106   | OR10AD1      | 6.9664758   | CYP27C1      | 8.9903719   |
| TTC28-AS1    | 6.2923691   | CFAP46       | 6.9927111   | MARK4        | 9.2951052   |
| PRSS54       | 6.3822862   | FAM71D       | 7.0038991   | LENG1        | 9.35898     |
| DTNA         | 6.3890924   | RFPL4B       | 7.0701793   | NHLRC4       | 9.398378    |
| ANTXRL       | 6.3984582   | lnc-FNBP1L-1 | 7.1551966   | ZNF316       | 9.4462473   |
| MOBP         | 6.4207067   | MGAT3        | 7.2282159   | ACOXL        | 9.5724837   |
| MIR7-3HG     | 6.4209444   | PAX6         | 7.3033091   | SRCAP        | 9.671568    |
| CD34         | 6.4370961   | LOC645752    | 7.3050594   | KCNK3        | 10.0640194  |
| TGIF1        | 6.4470144   | lnc-LBH-1    | 7.3052381   | DCLK1        | 10.2690463  |
| MPDU1        | 6.4530907   | ZNF81        | 7.3150909   | TAS1R3       | 10.668181   |
| RBMY1B       | 6.510512    | SEC16B       | 7.3177392   | LOC100996890 | 10.7557752  |
| SPACA5       | 6.5355937   | IL17B        | 7.3226625   | TTY1         | 11.8119832  |
| GALNT9       | 6.55416     | OR2T34       | 7.3514473   | CFAP69       | 11.8831277  |
| TET3         | 6.5613105   | YJEFN3       | 7.3739064   | FANK1        | 12.9244197  |
| TMEM262      | 6.5700999   | NRDE2        | 7.4863526   | TBCB         | 12.9618766  |
| SLC24A4      | 6.5793771   | SCN1B        | 7.5941163   | GPR101       | 14.6200567  |
| AGAP2        | 6.5845338   | ADAM19       | 7.633617    | SPATA19      | 16.0544986  |
